# Supplementary material
Source: publisher figshare collection journal article supplement (https://gsajournals.figshare.com/ndownloader/files/15347552)
Supplement: Supplementary file 1 [file 15347552]

## Sheet: Linkage order
New linkage group number (v3.0)	Old linkage group number (v2.5)
1	9
2	5
3	8
4	2
5	4
6	11
7	1
8	3
9	7
10	10
11	6

## Sheet: LGs v2.5
;	Tue,	25	Aug	2015,	16:29:45
;	ngrp=11,	nloc=746
group	1		Segregation distortion		significance levels: *:0.1 **:0.05 ***:0.01 ****:0.005 *****:0.001 ******:0.0005 *******:0.0001
S37_881224	0				*:0.1
S37_674256	2.606				**:0.05
S37_510714	4.612				***:0.01
S39_52145	8.472				****:0.005
S39_159579	10.508				*****:0.001
S39_213536	12.537				******:0.0005
S39_246341	13.83				*******:0.0001
S39_372373	17.228
S39_424294	18.358
S39_519701	20.723
S39_607851	22.172
S39_705745	23.368
S39_798037	26.722
S39_917993	28.295
S39_985444	30.06
S39_1108192	33.25
S39_1131969	34.501
S39_1214853	35.965
S39_1274450	38.167
S39_1291969	39.388
S39_1403209	40.947
S39_1541222	44.206
S39_1664524	48.808
S39_1719673	50.394
S39_1746953	51.917
S39_1797369	54.5
S39_1915420	58.378
S39_2003951	59.537
S39_2070574	60.604
S39_2132340	62.925
S39_2283747	65.409		**
S39_2417846	66.527
S39_2489252	68.935
S39_2623329	73.62
S39_2704502	74.886
S39_2890826	78.223
S39_2930133	79.247
S39_3012111	82.968
S39_3197519	86.9
S39_3683396	91.665
S39_3779441	93.503
S39_3918583	94.801
S31_347605	95.951
S31_706	96.822
S131_229447	99.028
S125_80617	99.569
S358_73665	99.801
S128_193703	100.118
S106_267002	100.266
S175_160054	100.452
S167_1348	100.53
S364_36099	101.04
S188_10278	101.391
S388_24610	101.793
S142_19617	102.26
S136_78677	102.352
S267_54341	102.381
S307_90957	102.381
S273_26947	102.381
S22_959926	102.803
S22_667489	105.857
S22_583530	106.739
S22_488196	108.085
S22_391388	109.211
S22_10632	113.303
S46_1212765	117.432		****
S46_1132758	120.924
S46_981896	126.035
S46_665170	127.938
S46_582783	129.529
S46_502023	134.327
S46_264301	137.053		***
S46_362907	139.025
S46_2230	143.289
group	2
S89_172001	0
S31_4299957	2.465
S31_4240138	4.28
S31_4117810	6.93
S31_3884033	10.342
S31_3719338	13.793		*
S31_3663006	15.377		**
S31_3620612	16.667		*
S31_3559656	17.965		**
S31_3479101	20.534		****
S31_3345546	23.554		****
S31_3049468	28.269		**
S31_2958771	30.642		***
S31_2714654	32.204		***
S31_2561941	34.351		**
S31_2535909	35.201		**
S31_2452320	37.529		**
S31_2253270	42.112		*
S31_2182653	44.648		**
S31_2130192	46.81		****
S31_2053175	48.786		**
S31_1947077	53.216		**
S31_1815730	55.468
S31_1699999	57.331
S31_1463406	63.461		***
S31_1348187	65.197		**
S31_1309837	67.459		**
S31_1310997	68.282		*
S31_1198717	70.709
S31_1184428	71.357
S31_1088513	74.876
S31_898832	77.316
S31_830883	79.538
S31_792037	80.777
S31_716175	82.172
S31_597867	83.507
S31_591367	85.337
S31_488098	88.446
S31_481019	89.549
S38_28166	90.191
S38_156474	92.568
S38_224707	94.77		*
S38_294162	97.717
S38_469949	98.75
S38_513741	100.08		*
S38_801286	103.665
S47_316873	105.726
S560_30925	107.46
S73_267391	107.605
S431_56579	107.873
S227_139419	108.209
S682_11666	108.411
S677_23594	108.564
S134_107950	108.564
S286_63633	108.564		*
S34_256364	110.009
S74_81699	113.254
S24_207931	114.365
S24_277884	117.104
S72_151194	121.1
S16_771917	122.314
S16_734977	124.985
S16_656072	125.924		**
S16_515476	127.999
S16_459581	129.721
S16_399210	131.654
S16_265629	135.705
S16_222398	136.926
S16_232093	137.486		***
S16_60118	141.347		*
S96_223194	143.816		**
S96_248414	146.284		**
S96_313276	147.529		**
S96_444336	150.506		**
S96_544215	152.443
S96_679241	156.949
S96_781339	159.859
S96_836434	161.783
S96_920891	163.449
S13_671615	163.948		*
S13_560738	165.595		**
S13_476613	167.299		**
S13_230617	169.683		*
S13_49559	172.787		**
group	3
S26_5894	0
S26_428550	4.45
S26_463892	5.506
S26_545520	7.979
S26_680020	10.992
S26_810151	13.596
S26_954602	15.652
S26_1008703	17.242
S26_1142956	20.008
S26_1281667	22.471
S26_1360224	24.317
S26_1426813	26.766
S26_1564328	30.342
S26_1626798	31.144
S26_1668693	33.313
S26_1808204	34.04
S26_1849600	34.882
S26_1941305	36.446
S26_1957030	37.275
S26_1970591	38.724
S26_2082585	42.468
S26_2132158	43.979
S26_2282844	49.322
S26_2405079	50.433		*
S26_2488086	52.109
S26_2636396	55.021
S26_2778935	59.051		*
S26_3001319	61.901
S26_3148924	63.362		*
S26_3329208	66.541		*
S26_3421190	68.415		*****
S26_3538465	70.682
S17_161814	78.248
S17_376953	84.563		*
S17_509088	87.323
S17_564781	88.051		*
S17_625231	88.708
S17_852424	91.56
S78_311575	92.528
S78_167044	93.577
S50_258730	95.771
S50_57670	97.072		*
S50_349549	98.237
S179_57709	99.564
S116_116236	99.818
S947_25399	100.266		**
S412_3470	100.473
S322_39425	100.473
S110_1977	100.732
S109_191308	101.076
S1435_5441	101.076		*
S762_23961	101.076		**
S1032_4753	101.099
S123_1219898	101.946
S230_82615	102.384
S123_775572	102.782
S123_608063	105
S123_209500	108.523
S33_16820	112.971
S33_152287	114.227
S33_520890	117.914
S33_614135	119.694
S33_901145	124.898		**
S33_956616	125.316		*
S33_1024681	127.161		*
S33_1071067	130.836
S33_1152637	131.556
S33_1324261	132.953
S33_1364536	135.358
S33_1479143	139.045
S33_1908680	146.096
group	4
S32_90806	0
S32_361091	2.488
S32_433917	3.735
S32_567383	6.353
S32_871742	9.331
S32_973302	10.704
S32_1032743	11.886
S32_1045014	12.281		**
S32_1134665	14.729
S32_1289120	19.247		**
S32_1470814	21.596		**
S32_1483507	22.356		**
S32_1660300	26.118		**
S32_1808934	29.549		***
S32_1960620	32.754		**
S32_2290494	37.433		**
S32_2414614	40.159		*
S32_2436388	41.376
S32_2473286	43.734		**
S32_2495262	45.027		****
S32_2712342	50.891		******
S32_2891173	52.46		*******
S32_3020737	54.342		*******
S32_3076398	57.278		*******
S32_3199935	60.428		*******
S32_3431549	62.676		*******
S32_3715779	67.922		*******
S32_3885452	69.062		*******
S10_1887424	80.998		*******
S10_1822329	81.78		*******
S10_1603419	85.184		*******
S10_581528	95.621		*******
S10_431497	97.415		*******
S10_302710	98.996		*******
S10_85895	101.568		*******
S29_1032367	119.311		*******
S29_1414405	124.655		*******
S29_1556008	128.498		*******
S29_1635461	130.971		*******
S60_1748835	134.691		*******
S60_1624910	136.513		******
S60_1421407	141.575		******
S60_1133949	150.115		*****
S60_956588	153.424		****
S60_826562	156.024		*
S60_602214	160.414		****
S60_369735	164.972		**
S60_33094	169.116		****
S255_83607	170.174		***
S68_97222	170.773		****
S59_182099	172.622
S203_45060	173.344
group	5
S53_6171191	0
S53_6003702	4.015
S53_5793564	10.392
S53_5564981	14.153
S53_5398195	18.209
S53_5086834	23.152
S53_4972590	25.088
S53_4765272	28.962
S53_4502902	32.473
S53_4351687	35.811
S53_4207550	40.197
S53_4124640	41.438
S53_4053435	45.012
S53_3732672	49.035
S53_3373653	56.265		*
S53_3275092	58.599
S53_3146110	59.332
S53_3047838	61.688
S53_2899553	63.816
S53_2813517	66.737
S53_2582490	70.468
S53_2531469	72.22
S53_2362276	76.509
S53_2087775	80.109
S53_1694225	84.133
S53_1116363	86.748
S53_979290	90.288		**
S53_829489	93.934
S53_65760	101.808
S53_31802	103.214		*
S79_363105	104.639
S67_20144	108.69
S45_290209	110.807
S45_28405	115.305
S118_912134	116.595
S118_687583	121.475
S810_45859	121.939
S280_12501	122.291
S100_166769	122.526
S121_29306	122.528
S301_36327	122.82
S306_7573	122.905
S94_282872	123.028
S194_115303	123.112
S440_45362	123.206
S576_39851	123.206
S66_119030	123.206
S118_356956	123.206
S749_4712	123.224		*
S48_84174	124.771
S104_61064	124.789
S207_39456	126.747
S207_50649	128.793
S102_2271552	131.363
S102_1933003	140.42
S102_1817079	142.377
S102_1481250	151.171
S102_944499	155.763
S102_374774	163.165
S102_176900	171.254
S102_19092	176.023
S228_10400	178.255
group	6
S198_102638	0		*
S5_8508	0.774
S5_587318	9.913
S5_745413	16.568
S5_908519	19.81
S5_1018126	23.593
S5_1179330	29.011
S5_1412470	33.268		*
S5_1579701	36.262
S12_87750	39.112
S12_191657	41.448		*
S12_335321	43.472
S12_422439	45.614		**
S12_680684	49.562		**
S12_718163	51.86
S12_1032550	55.994
S12_1230942	59.005
S35_230681	63.463		**
S105_134245	65.912		*
S76_254394	70.67
S564_34975	71.442
S821_32079	71.442
S92_89881	71.442		*
S172_93375	71.442
S100_19590	71.442
S242_35106	71.443		*
S821_7524	71.889
S377_59185	72.364		*
S58_8426	72.844
S133_2358	72.886		*
S40_63849	74.622
S40_550522	78.805
S40_843691	83.125
S40_943082	83.83
S40_1138921	89.261
S40_1272362	91.325		*
S40_1577338	94.941
S40_1563999	95.064		*
S40_1746284	97.352
S40_1854047	98.964
S40_2026633	100.364
S40_2268949	103.837		**
S40_2503602	107.768
S40_2755924	112.651
S40_2958432	115.717
S40_3212237	120.849
S40_3529380	129.44
group	7
S87_66723	0
S87_114389	1.807
S87_275990	6.681
S87_374973	10.947
S87_611740	22.251
S87_887886	27.43
S87_1166624	30.778
S87_1617965	35.703
S87_1675559	36.472
S87_1763324	43.49		****
S87_1929022	45.024		*****
S87_2250039	46.462		***
S166_103042	49.311		**
S166_10307	49.675		****
S69_261478	50.981		**
S69_39003	51.929		**
S165_88497	51.932		******
S644_7916	52.921		****
S605_17385	52.993		****
S921_16710	53.162		***
S206_36178	53.321		******
S223_16361	53.546		****
S854_26825	53.56		******
S924_12062	53.566		*******
S187_134062	53.566		****
S154_22808	53.566		***
S276_50935	53.741		****
S394_332145	53.978		*****
S99_63481	54.218		****
S99_173068	54.677		**
S56_130895	57.605		******
S56_248643	59.705		*******
S56_262197	61.48		*******
S6_47095	64.739		*******
S6_175574	65.945		*******
S6_214618	67.223		*******
S6_364356	69.596		*******
S6_515383	71.463		*******
S6_578233	72.614		*******
S6_640102	75.299		*******
S6_703481	76.231		*******
S6_798358	78.689		*******
S6_601047	84.884		*******
S6_1083000	92.812		*******
S6_1238598	94.816		*******
S6_1338473	95.807		*******
S3_177356	105.071		*******
S3_215797	105.699		*******
S3_353045	107.181		*******
S3_428003	108.247		*******
S3_653321	109.364		*******
S3_533473	110.041		****
S3_769199	112.706		*******
S3_783489	113.089		*******
S3_875367	114.131		*******
S3_962679	117.056		*******
S3_989793	117.692		****
S3_1076085	119.975		*******
S3_1112318	121.191		*******
S3_1235258	122.822		******
S3_1262731	124.789		*******
S43_147823	127.977		*******
S9_795163	132.883		*******
S9_680321	136.708		**
S9_519286	140.384		*
S9_406543	142.566
S9_229689	144.977
S9_124414	145.902
S9_89008	147.948
S9_50619	148.906
S9_14431	149.819
S27_13086	151.154
S27_75905	154.138
S27_211368	155.111
S27_299187	156.58
S27_442858	157.986
group	8
S81_5055	0
S81_144121	0.735
S81_416515	6.894
S81_435439	7.891
S93_265960	9.982
S93_383588	11.542		*
S93_501388	14.547
S93_706810	17.028
S93_786829	18.419
S93_810813	20.857
S93_900115	25.221
S93_1061165	28.205
S93_1153261	30.726
S93_1210915	31.804
S93_1722253	34.625
S93_1818232	38.805
S63_209140	42.646
S63_65867	44.434		**
S52_73742	45.556		*
S52_195407	47.669
S219_64015	50.662
S137_256978	51.342
S28_181874	51.502
S84_20806	51.576
S152_457	51.577
S75_340632	51.591
S168_133623	51.61
S316_17436	51.637
S533_32196	51.647
S292_53751	52.406
S64_12283	52.545
S28_293096	52.662
S137_218959	52.671
S168_64151	52.759
S219_91356	52.847
S533_18416	53.32
S292_81145	53.784
S28_264004	54.192		**
S379_53090	54.374
S41_329534	56.543
S41_220055	58.008
S41_99807	61.795
S41_31623	63.379
S55_243705	67.048		*
S55_142027	68.759
S77_161112	70.773
S11_526923	72.516
S11_491894	74.096
S11_313039	76.313
S11_231967	80.401
S11_98576	83.004
S25_131515	88.821
S25_263619	89.939
S25_340671	91.005
S25_460934	96.566
S25_666735	100.458		**
S44_2637777	108.005		**
S44_2350060	113.297
S44_2229606	116.48
S44_2143747	119.028
S44_2056943	120.151
S44_1930698	123.278
S44_1842761	126.422
S44_1629731	130.732
S44_1568526	135.106
S44_1460752	137.611
S44_1350247	141.426
S44_1264828	144.581
S44_1219877	146.043
S44_1142094	147.92
S44_1023171	149.932
S44_973817	150.958
S44_827783	153.907
S44_609479	158.062
S44_585603	159.193
S44_505985	161.914		**
S44_374845	163.844
S44_277874	165.315
S44_12343	167.721
group	9
S14_546328	0
S14_488761	1.6
S14_340286	3.138
S14_258127	5.56
S14_23401	10.118
S65_2263533	17.286
S65_2158212	18.691
S65_1807995	21.132
S65_1669668	25.881
S65_1598397	29.326
S65_1298515	32.834
S65_582736	40.269
S65_211445	45.67
S42_18588	47.947
S809_25433	50.001
S572_1856	50.361
S146_8720	50.582
S1011_13786	51.022
S153_31417	51.136
S220_137411	51.346
S90_539235	51.78
S23_100289	54.513
S114_18742	55.555
S114_63523	57.222
S7_606584	59.615
S7_435357	61.308
S7_330849	64.07
S7_194591	65.605
S1_89619	71.587
S1_304069	73.637
S1_371679	78.476
S1_489781	80.141		*
S1_562461	81.885
S1_622915	82.837
S1_659241	83.3
S1_836130	86.616
S8_1746462	91.251		*
S8_1651452	93.171
S8_1487669	96.918
S8_1277344	101.091
S8_1124395	102.673
S8_843148	106.856
S8_732483	109.038
S8_517875	110.749
S8_399906	113.166
S8_328643	116.184
S8_32221	120.701
S4_1459336	123.971
S4_1190955	128.294
S4_1261974	129.088
S4_1122153	131.276
S4_520770	138.797
S4_377790	140.864
S4_40640	144.953
S19_219372	148.808
S19_378096	150.854
S19_587219	153.149
S19_691701	154.625
S19_771394	155.299
S19_945492	157.532
S19_1150334	161.608
S19_1427673	165.724
S19_1560524	167.847
S19_1721645	169.105
S19_1854507	171.491
S19_1973392	175.339
S19_2100364	176.997
S19_2253124	178.787
S21_44750	181.685
S21_286547	186.658
S21_480806	189.465
S21_540433	190.643
S21_726381	193.581
S21_872361	197.107
S21_892371	198.01
S21_998987	198.879
S21_1186499	202.141
S21_1242392	203.409
S21_1467526	207.609
S21_1636879	214.21
S21_1778657	215.792
S21_1837331	218.147
S21_1943632	219.009
S21_1974267	220.468
S21_2054763	223.065
S21_2248455	226.543
S21_2327434	227.642
group	10
S15_1205269	0
S15_1077489	1.569
S15_1039150	3.635
S15_950370	4.967
S15_788139	9.882
S15_705808	10.921
S15_554545	12.437
S15_421308	15.875
S15_279516	20.223
S15_200252	21.371
S15_101027	22.437
S2_1007584	27.709
S2_915361	30.742		*
S2_770145	34.578		**
S2_595551	40.72		**
S2_478072	44.302		*
S2_361780	45.96
S2_319519	47.966		**
S2_200735	49.858
S2_31602	54.188
S18_1290892	58.637
S18_1182795	59.71
S18_1005562	62.348		**
S18_882796	65.638		*
S18_732609	68.901		**
S18_590934	70.837		**
S18_446648	73.656		*
S18_227632	78.331		**
S18_87814	81.832		**
S36_241812	83.019		***
S62_203959	84.108		*
S1149_9402	85.661		**
S606_24716	86.139		**
S321_58388	86.175		*
S124_254613	86.205		**
S945_9761	86.442		***
S834_11497	86.512		**
S124_74335	86.58		******
S215_140450	86.662		*
S964_22732	86.951		**
S62_466873	88.326		**
S70_166365	90.463		****
S61_50888	90.477		*
S91_193444	90.48		***
S61_431806	96.475		******
S61_632190	100.592		*******
S61_888157	105.752		*******
S61_1110901	110.508		*******
S61_1280599	114.473		*******
S61_1674280	118.11		*****
S61_1790531	120.434		*******
S61_1993061	124.448		******
S61_2212997	128.584		****
S61_2271775	129.6		**
S61_2296265	130.607		**
S61_2351567	131.696		*
S61_2496997	134.805
S61_2682900	136.378		**
S61_2917516	140.148		**
S61_3045950	143.248		**
S61_3169022	145.171		**
S61_3330685	150.548		*
S61_3464298	154.461		*
S61_3654543	157.537		**
S61_3710629	158.681		**
S61_3802108	160.541		*
group	11
S57_11008	0		*
S57_171246	1.062		*
S57_340173	6.185		****
S57_628297	11.78		******
S57_740763	14.747		******
S57_934979	16.909		*******
S57_1384555	25.079		*******
S57_2428313	39.201		*******
S54_2104336	42.769		*******
S54_2075095	44.325		*******
S54_1840141	47.663		*******
S54_1698942	52.044		****
S54_1571231	56.97		***
S54_1424126	58.096		****
S54_1199762	61.42		******
S54_1089621	63.143		***
S54_827267	64.572		****
S54_668954	66.433		****
S54_613823	66.808		**
S578_49361	68.663		****
S71_145728	68.734		****
S282_14961	68.856		****
S1222_2640	69.028		****
S120_117717	69.095		***
S477_32599	69.439		*****
S127_77149	69.826		*****
S51_280163	70.327		*******
S49_295361	70.329		******
S49_50151	72.463		****
S30_25676	81.061		*****
S30_207895	83.592		*****
S30_548508	86.365		****
S30_695915	87.182
S30_737484	88.847		****
S30_859847	92.72		**
S30_1176590	98.762
S30_1347925	100.632
S30_1518516	103.592
S30_1708522	107.446
S30_1813923	109.776
S30_1902254	114.128		**
S30_1953324	114.892
S30_2042062	118.347
S30_2095698	119.234
S20_35382	123.824
S20_170746	128.142		*
S20_255021	129.226
S20_490331	130.634

## Sheet: LGs v3.0
;	Fri,	11	May	2018,	10:27:01
;	ngrp=11,	nloc=632
group	1		Segregation distortion		significance levels: *:0.1 **:0.05 ***:0.01 ****:0.005 *****:0.001 ******:0.0005 *******:0.0001
LG-1_32671	0				*:0.1
LG-1_170704	4.078				**:0.05
LG-1_228394	4.862				***:0.01
LG-1_317242	6.027				****:0.005
LG-1_365769	7.718				*****:0.001
LG-1_403670	9.584				******:0.0005
LG-1_468132	10.741				*******:0.0001
LG-1_561851	12.501
LG-1_829500	16.207
LG-1_913052	19.509
LG-1_1008081	20.645
LG-1_1465637	25.647
LG-1_1551729	27.403
LG-1_1618294	28.384
LG-1_1736612	33.433
LG-1_1864936	34.737
LG-1_1941575	36.735
LG-1_2078144	37.44
LG-1_2564956	44.597
LG-1_2617646	46.879
LG-1_2727929	47.344
LG-1_3162800	52.238
LG-1_3391853	54.648
LG-1_3590691	56.035
SC-382_31952	56.836
SC-41_101524	56.994
SC-110_125446	57.151
SC-30_15008	57.309
CSC-22_271663	57.624
LG-1_4651839	57.86
SC-510_34347	58.58
LG-1_5147840	58.951
LG-1_5578304	61.105
LG-1_6277179	63.871
LG-1_6603388	66.453
LG-1_6795009	68.48
LG-1_6835572	70.918
LG-1_7035813	73.535
LG-1_7091113	75.09
LG-1_7173673	78.604
LG-1_7321342	80.722
LG-1_7550512	84.233
LG-1_7642800	87.056
LG-1_7701678	88.315
LG-1_7855425	91.706
LG-1_8021798	95.178
LG-1_8194994	98.808
LG-1_8268542	101.078
LG-1_8366843	103.037
LG-1_8486328	106.809
LG-1_8707503	111.126
LG-1_8861383	113.163
LG-1_8983536	114.679
LG-1_9054720	115.854
LG-1_9204793	119.928
LG-1_9396458	122.719
LG-1_9534024	124.813
LG-1_9753964	132.297
LG-1_9946209	134.82
LG-1_10371197	141.91
LG-1_10441381	143.978
LG-1_10685165	147.823
LG-1_10952558	150.593
LG-1_11252302	154.281
LG-1_11466549	157.587
LG-1_11644095	160.187
LG-1_11745588	161.603
LG-1_11890909	165.119
LG-1_12159818	168.152
LG-1_12267998	170.176
LG-1_12431957	173.144
LG-1_12506090	175.1
LG-1_12709306	180.284
LG-1_12798143	182.26
LG-1_13096063	186.327
LG-1_13192380	188.928
LG-1_13439369	192.38
LG-1_13560812	196.277
LG-1_13642486	198.833
LG-1_13769108	201.354
LG-1_13983782	206.866
LG-1_14118695	208.268
LG-1_14233371	213.581
LG-1_14319689	215.92
LG-1_14479839	218.056
LG-1_14672368	221.646
LG-1_14780753	223.136
LG-1_15176483	229.611
LG-1_15266646	231.401
LG-1_15358982	233.385
LG-1_15461862	239.232
LG-1_15549776	242.982
LG-1_15677874	244.668
LG-1_15777272	247.533
LG-1_15971871	251.102
LG-1_16053955	254.692
LG-1_16375763	257.373
group	2
LG-2_7350	0
LG-2_284593	4.134
LG-2_347490	5.143
LG-2_462071	8.372
LG-2_515096	10.191
LG-2_604449	12.675
LG-2_807400	18.476
LG-2_1081207	24.265
LG-2_1131433	25.845
LG-2_1351434	28.441
LG-2_1434218	30.011
LG-2_1499887	31.581
LG-2_1661163	33.32
LG-2_1753409	35.584
LG-2_1900017	38.054
LG-2_2094317	42.09
LG-2_2165025	42.759
LG-2_2286140	46.481		*
LG-2_2523412	52.625
LG-2_2620978	54.128
LG-2_2786367	56.871
LG-2_2941855	60.41
LG-2_3001273	62.359		*
LG-2_3145588	65.2		*
LG-2_3220733	67.335		*
LG-2_3351852	69.028
LG-2_3604319	74.149
LG-2_3682580	76.839
LG-2_3890207	80.22
LG-2_3988522	82.647
LG-2_4040773	85.079
LG-2_4146332	87.688
LG-2_4386763	91.294
LG-2_4749388	96.627
LG-2_5331918	98.98
LG-2_5257744	100.11
LG-2_5693713	109.513
LG-2_5878608	112.8
LG-2_6018036	113.584
LG-2_6130528	114.55
LG-2_6426636	119.062		*
LG-2_6481514	120.715
LG-2_6913844	124.244
LG-2_6813312	125.721
LG-2_6649292	128.414
LG-2_7122349	130.518
LG-2_7323407	132.44
SC-155_35562	133.375
SC-155_81535	133.631
SC-378_21180	134.149
LG-2_7497450	138.497
LG-2_7729570	141.712
LG-2_7831806	144.936
SC-355_16220	146.688
LG-2_9062873	148.009
LG-2_9979157	150.083
SC-117_20634	151.496
SC-163_4212	154.465
LG-2_8002510	157.745
SC-21_161418	158.643
SC-297_39393	159.32
SC-14_279674	159.846
SC-21_229410	160.117
SC-342_13438	160.389
LG-2_8766000	160.855
SC-112_118671	161.293
LG-2_8427886	161.514
LG-2_11006544	162.874
LG-2_11168206	166.707
LG-2_11251882	167.886
LG-2_11664125	173.599
LG-2_11769047	176.075
LG-2_11834058	177.817
LG-2_11981455	180.786
LG-2_12101415	184.552
LG-2_12243876	189.779
LG-2_12322725	190.73
LG-2_12469638	192.01
LG-2_12663814	194.829
LG-2_13351245	200.8
LG-2_13451961	202.928
LG-2_13556267	208.103
LG-2_13653250	211.83
LG-2_13790343	216.156
LG-2_13922708	217.776
LG-2_13840736	218.952
group	3
LG-3_5055	0
LG-3_130206	1.184
LG-3_419336	8.07
LG-3_729662	12.398
LG-3_960941	16.465
LG-3_1196328	20.023
LG-3_1260225	21.608
LG-3_1365680	28.572
LG-3_1521192	31.621
LG-3_1653799	35.619
LG-3_2026470	36.881
LG-3_2223516	40.741
LG-3_2592534	45.649		*
LG-3_2975209	49.159		*
LG-3_3586389	52.863
SC-57_83648	53.481
LG-3_5448412	54.354
SC-59_147698	54.567
SC-570_31984	54.719
SC-224_51369	55.026
SC-193_63389	55.644
SC-401_28348	56.262
SC-657_14638	56.753
SC-80_117997	57.468
SC-205_18979	58.76
SC-646_32824	60.798
LG-3_4772768	61.449
SC-195_76685	61.666
SC-492_49270	62.071
LG-3_6104855	62.375
SC-166_29346	62.68
LG-3_6665699	64.249
SC-455_39865	64.861
CSC-121_121473	65.163
LG-3_7045208	65.947
LG-3_7159233	67.44
LG-3_7253787	72.373
LG-3_7347728	75.12
LG-3_7562212	77.675
LG-3_7701360	80.423
LG-3_8013298	82.448
LG-3_8154760	84.645
LG-3_8375251	86.995
LG-3_8580819	90.9
LG-3_8692826	93.592
LG-3_8758127	95.268
LG-3_8870302	98.633
LG-3_9078270	103.034
LG-3_9296111	107.505
LG-3_9356881	109.629
LG-3_9881369	126.791
LG-3_9981409	128.299
LG-3_10093080	130.423
LG-3_10149072	132.178
LG-3_10228026	133.785
LG-3_10302922	136.254
LG-3_10495835	139.623
LG-3_10638887	145.546
LG-3_10731006	147.31
LG-3_10791442	148.091
LG-3_10845848	151.4
LG-3_11005674	156.949
LG-3_11108082	160.325
LG-3_11181698	163.519
LG-3_11271527	167.086
LG-3_11604020	174.129
group	4
LG-4_28847	0
LG-4_284839	3.379
LG-4_344674	5.801
LG-4_433552	8.003
LG-4_500116	9.588
LG-4_653736	11.897
LG-4_963930	18.214		**
LG-4_1068047	20.885		**
LG-4_1204346	22.846		****
LG-4_1370085	25.51		***
LG-4_1493479	27.638		**
LG-4_1669536	32.099		**
LG-4_1872232	34.095		***
LG-4_1938358	35.969		*
LG-4_2106572	39.956		**
LG-4_2194623	42.068		*
LG-4_2317435	44.95
LG-4_2404248	47.992		*
LG-4_2594704	54.022		*
LG-4_2756515	57.379
LG-4_2845855	58.998
LG-4_2974019	63.757		*
LG-4_3140973	67.387		*
LG-4_3284926	70.354		*
LG-4_3362330	72.784
LG-4_3508068	77.779
LG-4_3581622	79.117
LG-4_3768342	83.2
LG-4_3864164	84.957
LG-4_4035668	89.808
LG-4_4116417	94.182
LG-4_4636560	95.011
LG-4_4776268	98.304
LG-4_4830199	99.868
LG-4_4892622	102.269
LG-4_5403740	107.038
SC-65_141836	110.791
LG-4_6358764	111.553
SC-316_30233	111.964
SC-212_82633	112.17
SC-537_23694	112.478
CSC-273_59842	112.785
LG-4_6490667	113.247
SC-694_8166	114.026
LG-4_7660671	116.371
LG-4_8530136	123.15
LG-4_9076068	125.22
LG-4_8877209	129.26
LG-4_9312754	132.927
LG-4_9470528	134.894
LG-4_9579305	137.399
LG-4_9692219	141.385
LG-4_9771138	142.84
LG-4_9825780	144.294
LG-4_10107590	148.224		**
LG-4_9996082	148.919		**
LG-4_10285783	153.318
LG-4_10391011	153.88		*
LG-4_10473144	157.462		**
LG-4_10666953	163.102
LG-4_10824444	168.392
LG-4_10909016	170.768
LG-4_11202111	175.662		**
LG-4_11386091	178.332		**
LG-4_11591171	182.074		*
group	5
LG-5_85350	0
LG-5_151660	1.144
LG-5_443490	4.816
LG-5_576911	8.267
LG-5_976910	13.063
LG-5_1102889	16.502
LG-5_1409687	24.08		**
LG-5_1494383	26.061		**
LG-5_1670547	30.456		**
LG-5_1865034	35.133		**
LG-5_1989513	38.079		**
LG-5_2168856	40.94		**
LG-5_2384600	43.995		**
LG-5_2483948	48.573		**
LG-5_2578300	51.218		****
LG-5_3743393	74.457		*******
LG-5_4189483	78.007		*******
LG-5_5942181	106.334		*******
LG-5_6582545	112.665		*******
LG-5_7400306	127.851		*******
LG-5_8878872	166.161		******
LG-5_9196667	172.874		*
LG-5_10688908	188.224		**
LG-5_10518550	188.718		**
LG-5_11056269	189.696		*
SC-493_24126	190.394
group	6
LG-6_36817	0
LG-6_149654	1.419
LG-6_206282	3.403
LG-6_273939	4.68		**
LG-6_398962	7.908		**
LG-6_587184	12.409		****
LG-6_1702203	34.601		*******
LG-6_2430843	46.995		*******
LG-6_4173964	65.526		****
LG-6_5153191	76.698		****
LG-6_5910654	78.388		***
LG-6_7411984	81.117		**
LG-6_3574493	85.7		**
LG-6_7784418	86.246		**
LG-6_8172139	99.01		****
LG-6_8974532	112.119
LG-6_9077011	114.293
LG-6_9166162	116.92
LG-6_9234856	118.341
LG-6_9408877	120.331
LG-6_9677641	126.869
LG-6_9783506	129.709
LG-6_9850851	133.281
LG-6_10026945	137.795
LG-6_10081043	139.904
LG-6_10156275	141.346
LG-6_10230157	142.573
LG-6_10489314	147.419
LG-6_10862131	150.24
group	7
LG-7_7321	0
LG-7_230153	2.636
LG-7_416438	5.434
LG-7_1014301	8.777
LG-7_963744	11.223
LG-7_1121963	15.525
LG-7_1195363	18.132
LG-7_1262930	19.935
LG-7_1334617	22.545
LG-7_1516316	25.024
LG-7_1639710	27.137
LG-7_1760389	30.002
LG-7_1884099	32.476
LG-7_1948370	34.288
LG-7_2075366	38.127
LG-7_2163914	40.617
LG-7_2245399	44.357
LG-7_2324271	46.326
LG-7_2369619	47.282
LG-7_2504547	50.686
LG-7_2663474	57.447
LG-7_2769056	62.122
LG-7_2858637	64.744
LG-7_2929789	66.323
LG-7_3025168	67.761
LG-7_3118435	70.864
LG-7_3494623	78.437
LG-7_3610163	81.712
LG-7_3711550	83.662
LG-7_3776491	86.494
LG-7_3866534	87.919
LG-7_3929804	90.352
LG-7_3997724	92.272
LG-7_4101391	94.2
LG-7_4156440	95.625
LG-7_4242117	98.371
LG-7_4484227	103.714
LG-7_5525089	109.267
SC-106_42868	111.055
SC-130_116289	111.527
SC-204_84551	113.316
SC-77_13900	114.879
SC-359_49025	115.811
SC-148_105042	116.845
LG-7_6682555	117.156
CSC-271_17100	117.625
SC-134_69218	117.779
SC-102_117845	118.089
CSC-260_59258	118.243
SC-335_38586	118.243
LG-7_6070678	118.243
LG-7_6303449	118.569
LG-7_8654688	122.502
LG-7_8777882	123.785
LG-7_9057127	126.188
LG-7_9192108	127.505
LG-7_9371226	131.187
LG-7_9425123	132.368
LG-7_9476475	135.291
LG-7_9585221	136.105
LG-7_9656381	141.439
LG-7_9756670	143.451
LG-7_9945914	144.448
LG-7_10275565	154.518
group	8
LG-8_5900	0
LG-8_244262	0.991
LG-8_432850	4.512
LG-8_484053	7.447
LG-8_555115	8.929
LG-8_684943	11.367
LG-8_816414	14.268
LG-8_962149	16.265
LG-8_1022990	18.216
LG-8_1145072	20.988
LG-8_1288562	23.327
LG-8_1366487	25.626
LG-8_1448895	29.51
LG-8_1549913	31.001
LG-8_1637175	33.439
LG-8_1703360	36.215
LG-8_1777218	36.676
LG-8_1980470	39.984
LG-8_2094783	43.313
LG-8_2164995	45.751
LG-8_2289458	50.032
LG-8_2369506	51.511
LG-8_2669922	57.602
LG-8_3126534	64.191		*
LG-8_3450260	70.091
LG-8_3895677	81.63
LG-8_4243483	92.321
LG-8_4426370	95.613
LG-8_4588362	97.877
LG-8_4962671	100.369
LG-8_5236099	103.784
LG-8_5506694	105.398
LG-8_5801905	107.135
LG-8_6150241	108.688
SC-18_84870	110.105
SC-138_79382	111.021
SC-590_3023	111.972
SC-648_26131	112.761
SC-54_26135	113.549
LG-8_7663877	114.349
LG-8_7867497	116.83
LG-8_8229783	120.542
LG-8_8339211	123.049
LG-8_8605050	126.868
LG-8_8972663	129.946
LG-8_9065919	132.095		*
LG-8_9167760	133.855
LG-8_9563683	146.675		*
LG-8_9694523	148.228
LG-8_9849824	150.993
LG-8_9971495	156.926
LG-8_10175686	158.689
LG-8_10332371	161.017
LG-8_10404462	163.686
group	9
LG-9_40043	0
LG-9_144495	3.35
LG-9_197198	4.746
LG-9_280040	7.281
LG-9_378672	12.028
LG-9_560743	19.135
LG-9_615680	22.544
LG-9_774841	25.858
LG-9_1031733	29.78
LG-9_1101418	31.403
LG-9_1170534	32.528
LG-9_1293529	34.503
LG-9_1568819	37.924
LG-9_1621860	39.047
LG-9_1683118	40.864
LG-9_4202184	51.808		****
LG-9_6262588	73.421		*******
LG-9_7801122	97.458		*******
LG-9_8598791	112.667		*******
LG-9_9366667	133.027
LG-9_9478557	135.033
LG-9_9771141	138.853
LG-9_9845406	140.122
LG-9_9939692	144.283
LG-9_10255989	147.909
Group	10
LG-10_53015	0
LG-10_104728	1.567
LG-10_309768	4.534
LG-10_367243	9.092
LG-10_552987	10.268
LG-10_625919	11.651
LG-10_704443	12.677
LG-10_956130	19.233
LG-10_1015412	20.548
LG-10_1169683	24.064
LG-10_1379218	26.571
LG-10_1487080	29.109
LG-10_1560867	32.117		**
LG-10_1676940	35.879		**
LG-10_1764535	39.433		**
LG-10_1881102	42.574		**
LG-10_1981127	45.911
LG-10_2050925	47.312
LG-10_2187199	49.458
LG-10_2272094	52.496
LG-10_2356441	53.783
LG-10_2422338	56.449
LG-10_2506660	57.733
LG-10_2700176	60.606
LG-10_2845165	63.471
LG-10_2913733	64.595
LG-10_3030564	66.744
LG-10_3101048	68.014
LG-10_3152231	69.235
LG-10_3276258	71.583
LG-10_3411286	74.28		**
LG-10_3519267	76.599		**
LG-10_5601017	83.629		**
LG-10_4256383	86.258		**
SC-595_31728	86.733
LG-10_4698306	87.129		**
LG-10_6373157	89.597		****
LG-10_6463959	91.035		****
LG-10_6557332	95.226		******
LG-10_6614444	96.823		*******
LG-10_6765795	99.358		*******
LG-10_6860183	100.397		*******
LG-10_6939885	102.669		*******
LG-10_7075661	105.65		******
LG-10_7248003	109.739		*******
LG-10_7418217	113.641		*******
LG-10_7526829	116.445		******
LG-10_7721857	118.547		*******
LG-10_7821288	119.637		****
LG-10_7963065	122.948		*******
LG-10_8072985	124.875		*******
LG-10_8152784	127.316		******
LG-10_8222182	129.932		***
LG-10_8354897	131.518		*****
LG-10_8420829	132.452		****
LG-10_8639333	137.53
LG-10_8697485	138.799
LG-10_9188577	144.738		**
LG-10_9251916	145.734		**
LG-10_9328218	147.888		**
LG-10_9447470	151.79		*
LG-10_9507279	155.279		**
LG-10_9608509	157.073		*
LG-10_9691721	158.535		*
LG-10_9815162	160.444		*
LG-10_9913125	162.177
LG-10_9988508	164.291
group	11
LG-11_25445	0
LG-11_714815	11.065
LG-11_872907	17.492
LG-11_1080068	21.304
LG-11_1145429	24.526
LG-11_1213591	27.626
LG-11_1313107	31.118		*
LG-11_1436071	33.264		*
LG-11_1552878	36.238		*
LG-11_1707372	39.569
LG-11_1824411	43.539
LG-11_1936088	46.028
LG-11_2044339	47.961
LG-11_2148098	50.11
LG-11_2272600	53.096
LG-11_2424170	55.332
LG-11_2563890	58.224
LG-11_2776802	60.946
LG-11_2976064	64.888
LG-11_3175270	67.025
LG-11_3345815	71.185		*
LG-11_3558105	72.831		*
SC-532_30546	78.677
LG-11_4532745	79.338
SC-31_138236	79.498
SC-699_12167	79.65
SC-186_12187	79.802
SC-94_90980	79.953
SC-127_91452	80.112
SC-479_21172	80.594
SC-186_93499	81.075
LG-11_4972925	82.73
LG-11_5258873	83.628		*
LG-11_5458347	84.528
LG-11_5681603	86.366
LG-11_5778412	88.111
LG-11_5946148	90.343
LG-11_6055865	92.239
LG-11_6251140	95.702
LG-11_6366559	99.013
LG-11_6605443	102.62
LG-11_6875321	105.18
LG-11_7033028	106.894
LG-11_7176272	108.633
LG-11_7447213	111.621
LG-11_7566933	113.939
LG-11_7730876	117.954
LG-11_7786680	119.07
LG-11_8002508	122.5
LG-11_8203728	125.66
LG-11_8411564	130.328
LG-11_8723718	137.447
LG-11_8801423	139.298
